# Supplementary material for: Rab8, Rab11, and Rab35 coordinate lumen and cilia formation during Zebrafish Left-Right Organizer development
Source: bioRxiv or medRxiv preprint supplement (doi:10.1101/2022.10.31.514532), 2023-01-04
Supplement: Supplementary file [file media-1.pdf]

**Table S1. Detailed statistical analysis of results reported in this study.**

| Figure        | Category                                      | n cell | n embryo | n experiment | Statistical Test | Parameters        | Result | p-value |
|---------------|-----------------------------------------------|--------|----------|--------------|------------------|-------------------|--------|---------|
| 1C            | Pre-Rosette                                   | N/A    | n=7      | n>3          | One Way ANOVA    | F (2,31) = 6.917  | **     | 0.0033  |
|               | Rosette                                       | N/A    | n=7      |              |                  |                   |        |         |
|               | Lumen                                         | N/A    | n=20     |              |                  |                   |        |         |
| 1D            | Pre-Rosette                                   | n=8    | n=1      | N/A          | One Way ANOVA    | F (2,21) = 13.62  | N/A    | N/A     |
|               | Rosette                                       | n=8    | n=1      |              |                  |                   | ***    | 0.0006  |
|               | Lumen                                         | n=8    | n=1      |              |                  |                   | ***    | 0.0003  |
| 1E            | N/A                                           | N/A    | n=29     | n>3          | N/A              | N/A               | N/A    | N/A     |
| 2F            | Rab8 Pre-rosette                              | n=8    | n=3      | N/A          | N/A              | N/A               | N/A    | N/A     |
|               | Rab8 rosette                                  |        |          |              |                  |                   |        |         |
|               | Rab8 lumen                                    |        |          |              |                  |                   |        |         |
|               | Rab11 Pre-rosette                             | n=12   | n=3      | N/A          | N/A              |                   |        |         |
|               | Rab11 rosette                                 |        |          |              |                  |                   |        |         |
|               | Rab11 lumen                                   |        |          |              |                  |                   |        |         |
|               | Rab35 Pre-rosette                             | n=4    | n=1      | N/A          | N/A              |                   |        |         |
|               | Rab35 rosette                                 |        |          |              |                  |                   |        |         |
|               | Rab35 lumen                                   |        |          |              |                  |                   |        |         |
|               | Actin Pre-rosette                             | n=12   | n=3      | N/A          | N/A              |                   |        |         |
| Actin rosette |                                               |        |          |              |                  |                   |        |         |
| Actin lumen   |                                               |        |          |              |                  |                   |        |         |
| 2G            | KV cells with luminal cilia across lumen area | N/A    | n=29     | n>3          | N/A              | N/A               | N/A    | N/A     |
| 3C            | CRY2                                          | N/A    | n=3      | n=3          | N/A              | N/A               | N/A    | N/A     |
|               | Rab8 clustering                               | N/A    | n=3      |              | N/A              | N/A               | N/A    | N/A     |
|               | Rab11 clustering                              | N/A    | n=3      |              | N/A              | N/A               | N/A    | N/A     |
|               | Rab35 clustering                              | N/A    | n=3      |              | N/A              | N/A               | N/A    | N/A     |
| 3D            | CRY2                                          | N/A    | n=29     | n>3          | N/A              | N/A               | N/A    | N/A     |
|               | Rab8 clustering                               | N/A    | n=27     |              | N/A              | N/A               | N/A    | N/A     |
|               | Rab11 clustering                              | N/A    | n=40     |              | N/A              | N/A               | N/A    | N/A     |
|               | Rab35 clustering                              | N/A    | n=32     |              | N/A              | N/A               | N/A    | N/A     |
| S3B           | CRY2                                          | N/A    | n=50     | n=11         | One Way ANOVA    | F (3, 94) = 18.43 | N/A    | N/A     |
|               | Rab8 clustering                               | N/A    | n=9      | n=3          |                  |                   | ****   | <0.0001 |
|               | Rab11 clustering                              | N/A    | n=16     | n=4          |                  |                   | n.s.   | 0.9962  |
|               | Rab35 clustering                              | N/A    | n=23     | n=2          |                  |                   | ****   | <0.0001 |
| S3E           | Control MO                                    | N/A    | n=12     | n=3          | One Way ANOVA    | F (3, 58) = 51.52 | N/A    | N/A     |
|               | Rab8 MO                                       | N/A    | n=13     | n=2          |                  |                   | n.s.   | 0.0839  |
|               | Rab11 MO                                      | N/A    | n=21     | n=2          |                  |                   | ****   | <0.0001 |
|               | Rab35 MO                                      | N/A    | n=16     | n=4          |                  |                   | ****   | <0.0001 |

|     |                          |       |       |     |               |                    |      |         |
|-----|--------------------------|-------|-------|-----|---------------|--------------------|------|---------|
| 4C  | Rab8 Clustering          | N/A   | n=8   | n=3 | One Way ANOVA | F (2, 27) = 43.87  | N/A  | N/A     |
|     | Rab11 Clustering         | N/A   | n=9   |     |               |                    | **** | <0.0001 |
|     | Rab35 Clustering         | N/A   | n=13  |     |               |                    | **   | 0.0015  |
| 4D  | Rab8 Clustering          | N/A   | n=9   | n=3 | One Way ANOVA | F (2, 24) = 946.4  | N/A  | N/A     |
|     | Rab11 Clustering         | N/A   | n=9   |     |               |                    | **** | <0.0001 |
|     | Rab35 Clustering         | N/A   | n=9   |     |               |                    | n.s. | 0.5421  |
| 4F  | Rab11 Clustering-Rab8    | N/A   | n=13  | n>2 | One Way ANOVA | F (2, 30) = 63.95  | N/A  | N/A     |
|     | Rab11 Clustering-Rab35   | N/A   | n=9   |     |               |                    | **** | <0.0001 |
|     | Rab35 Clustering-Rab11   | N/A   | n=13  |     |               |                    | **** | <0.0001 |
| S4C | Control MO               | n=52  | n=3   | n>2 | One Way ANOVA | F (3, 319) = 74.45 | N/A  | N/A     |
|     | Rab8 MO                  | n=105 | n=7   |     |               |                    | **** | <0.0001 |
|     | Rab11 MO                 | n=55  | n=3   |     |               |                    | **** | <0.0001 |
|     | Rab35 MO                 | n=111 | n=5   |     |               |                    | **** | <0.0001 |
| 5D  | CRY2                     | N/A   | n=16  | n>2 | One Way ANOVA | F (3, 31) = 12.27  | N/A  | N/A     |
|     | Rab8 clustering          | N/A   | n=16  |     |               |                    | n.s. | 0.2732  |
|     | Rab11 clustering         | N/A   | n=5   |     |               |                    | **** | <0.0001 |
|     | Rab35 clustering         | N/A   | n=15  |     |               |                    | **   | 0.0009  |
| 5E  | CRY2                     | n=433 | n=17  | n>3 | One Way ANOVA | F (3, 874) = 189.2 | N/A  | N/A     |
|     | Rab8 clustering          | n=145 | n=4   |     |               |                    | **** | <0.0001 |
|     | Rab11 clustering         | n=61  | n=5   |     |               |                    | **** | <0.0001 |
|     | Rab35 clustering         | n=239 | n=8   |     |               |                    | **** | <0.0001 |
| 5F  | CRY2                     | N/A   | n=16  | n>2 | One Way ANOVA | F (3, 31) = 13.27  | N/A  | N/A     |
|     | Rab8 clustering          | N/A   | n=5   |     |               |                    | n.s. | 0.8825  |
|     | Rab11 clustering         | N/A   | n=6   |     |               |                    | **   | 0.0070  |
|     | Rab35 clustering         | N/A   | n=5   |     |               |                    | **** | <0.0001 |
| 5G  | CRY2                     | n=91  | n=6   | n=3 | One Way ANOVA | F (3, 299) = 46.89 | N/A  | N/A     |
|     | Rab8 clustering          | n=69  | n=6   |     |               |                    | n.s. | 0.9545  |
|     | Rab11 clustering         | n=49  | n=4   |     |               |                    | **** | <0.0001 |
|     | Rab35 clustering         | n=94  | n=9   |     |               |                    | **** | <0.0001 |
| 6C  | No tail-CRY2             | N/A   | n=85  | n=3 | One Way ANOVA | F (3, 8) = 4.645   | N/A  | N/A     |
|     | No tail- Rab8 clustering |       | n=135 |     |               |                    | n.s. | 0.1235  |

|    |                              |       |       |      |               |                  |      |               |
|----|------------------------------|-------|-------|------|---------------|------------------|------|---------------|
|    | No tail-Rab11 clustering     |       | n=120 |      |               |                  | n.s. | 0.0860        |
|    | No tail-Rab35 clustering     |       | n=88  |      |               |                  | *    | 0.0167        |
|    | Curved Tail-CR2              | N/A   | n=85  | n=3  | One Way ANOVA | F (3, 8) = 8.210 | N/A  | N/A           |
|    | Curved Tail-Rab8 clustering  |       | n=135 |      |               |                  | **   | 0.0034        |
|    | Curved Tail-Rab11 clustering |       | n=120 |      |               |                  | *    | 0.0363        |
|    | Curved Tail-Rab35 clustering |       | n=88  |      |               |                  | *    | 0.0254        |
|    | Single Eye-CRY2              |       | n=85  |      |               |                  | N/A  | N/A           |
|    | Single Eye-Rab8 clustering   | N/A   | n=135 | n=3  | One Way ANOVA | F (3, 8) = 3.707 | n.s. | 0.1292        |
|    | Single Eye-Rab11 clustering  |       | n=120 |      |               |                  | n.s. | 0.0800        |
|    | Single Eye-Rab35 clustering  |       | n=88  |      |               |                  | *    | 0.0367        |
|    | CRY2                         |       | n=161 |      |               |                  | n=3  | One Way ANOVA |
| 6E | Rab8 Clustering              | n=264 | n=4   | **** | <0.0001       |                  |      |               |
|    | Rab11 Clustering             | n=269 | n=4   | **** | <0.0001       |                  |      |               |
|    | Rab35 Clustering             | n=88  | n=3   | ***  | 0.0001        |                  |      |               |
